# Supplementary material for: Type III Effector Activation via Nucleotide Binding, Phosphorylation, and Host Target Interaction
Source: PubMed Central journal article supplement (PMC1839166; doi:10.1371/journal.ppat.0030048), 2007-03-30

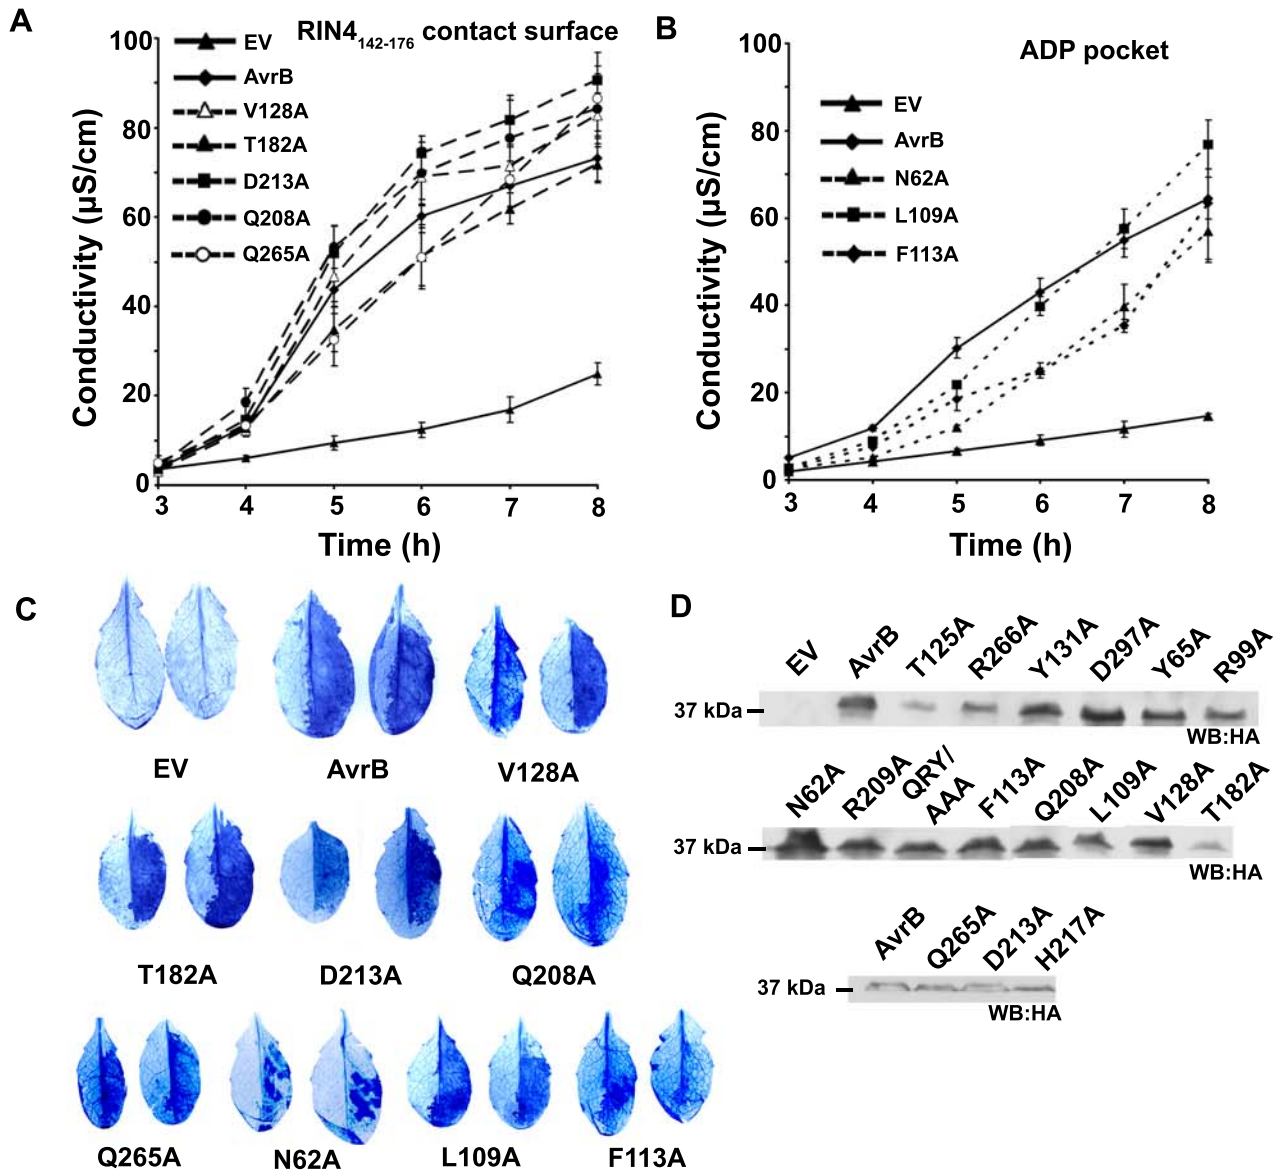

Supplement: ppat.0030048.sg002.pdf [file ppat.0030048.sg002.pdf]
